# Supplementary material
Source: PubMed Central journal article supplement (PMC7990612)
Supplement: 14-00868.pdf [file 14-00868.pdf]

**On-line Table: Angiographic parameters identified for every patient with a brain vascular malformation**

| Field                                            | Data Type/Range                                            |
|--------------------------------------------------|------------------------------------------------------------|
| Study ID                                         | String                                                     |
| Review date                                      | Date                                                       |
| Imaging source information                       |                                                            |
| Collector                                        | (String)                                                   |
| Date entered                                     | (Date)                                                     |
| Other collector                                  | (String)                                                   |
| Angiogram available                              | Y/n/unknown                                                |
| Angiography date                                 | (Date)                                                     |
| MRI date                                         | (Date)                                                     |
| CT date                                          | (Date)                                                     |
| Supersselective angio                            | (String)                                                   |
| Image source comment                             | (String)                                                   |
| AVM type and No.                                 |                                                            |
| Spinal fistula                                   | Numeric (0–5) or unknown                                   |
| Cerebral fistula                                 | Numeric (0–5) or unknown                                   |
| Cerebral AVM                                     | Numeric (0–5) or unknown                                   |
| Micro-AVM/cap malformation                       | Numeric (0–5) or unknown                                   |
| Other                                            | (string)                                                   |
| Other imaging findings                           |                                                            |
| Perifocal gliosis                                | Y/n/unknown/unavailable                                    |
| Cortical dysplasia                               | Y/n/unknown/unavailable                                    |
| Ischemic stroke?                                 | Y/n/unknown/unavailable                                    |
| WM hyperintensities inappropriate for age        | Y/n/unknown/unavailable                                    |
| Other lesions                                    | String                                                     |
| Angioarchitectonics and presumed pathomechanisms |                                                            |
| Cerebral fistula                                 |                                                            |
| Pial single hole with venous pouch?              | Y/n                                                        |
| Fistula side                                     | R/L/midline                                                |
| Fistula lobe                                     | Frontal/parietal/temporal/occ/limbic/brain stem/cerebellum |
| Fistula location                                 | Superficial/subcortical/deep                               |
| Describe anatomic location                       |                                                            |
| Feeders (characteristics)                        |                                                            |
| Pial-to-pial collateralization                   | Y/n/unknown/unavailable                                    |
| Moyamoya-type changes                            | Y/n/unknown/unavailable                                    |
| Stenoses on arteries                             | Y/n/unknown/unavailable                                    |
| Type                                             | Pial/choroidal                                             |
| Feeding arteries (No.)                           |                                                            |
| ICA penetrators                                  | Numeric (0–5) or unknown                                   |
| AchoA                                            | Numeric (0–5) or unknown                                   |
| ACA                                              | Numeric (0–5) or unknown                                   |
| MCA cortical                                     | Numeric (0–5) or unknown                                   |
| ACA/MCA penetrators                              | Numeric (0–5) or unknown                                   |
| VA branches or penetrators                       | Numeric (0–5) or unknown                                   |
| PCA cortical                                     | Numeric (0–5) or unknown                                   |
| PCA penetrators                                  | Numeric (0–5) or unknown                                   |
| PchoA                                            | Numeric (0–5) or unknown                                   |
| BA penetrators                                   | Numeric (0–5) or unknown                                   |
| SCA                                              | Numeric (0–5) or unknown                                   |
| AICA                                             | Numeric (0–5) or unknown                                   |
| PICA                                             | Numeric (0–5) or unknown                                   |
| ECA branches (dural)                             | Numeric (0–5) or unknown                                   |
| Aneurysms                                        |                                                            |
| No.                                              | Numeric (0–5) or unknown                                   |
| High-flow                                        | Y/n/unknown/unavailable                                    |
| Proximal                                         | Y/n/unknown/unavailable                                    |
| Distal                                           | Y/n/unknown/unavailable                                    |
| Intranidal                                       | Y/n/unknown/unavailable                                    |

Continued on next page

## Continued

| Field                                | Data Type/Range                         |
|--------------------------------------|-----------------------------------------|
| Venous drainage                      |                                         |
| No.                                  | Numeric (0–5) or unknown                |
| Type                                 | Superficial/deep/both                   |
| Venous stenosis                      | 0–24, 25–49, 75–99, 100 = occlusion     |
| Venous ectasia                       | No, yes, unknown, unavailable           |
| Venous reflux                        | No, yes, unknown, unavailable           |
| Distal thrombosis/stenosis           | 0–24, 25–49, 75–99, 100 = occlusion     |
| Pseudophlebitic pattern              | Y/n/unknown/unavailable                 |
| Other signs of venous congestion     | Y/n/unknown/unavailable                 |
| Pathomechanism                       |                                         |
| Asymptomatic                         | Y/n/unknown/unavailable                 |
| Thrombosis of pouch                  | Proven/likely/unlikely/excluded         |
| Mass effect                          | Proven/likely/unlikely/excluded         |
| Congestion                           | Proven/likely/unlikely/excluded         |
| Steal                                | Proven/likely/unlikely/excluded         |
| Intraparenchymal hemorrhage          | Proven/likely/unlikely/excluded         |
| Subarachnoid hemorrhage              | Proven/likely/unlikely/excluded         |
| Cranial AVM                          |                                         |
| AVM eloquence                        |                                         |
| Eloquence                            | Noneloquent, eloquent, unknown          |
| Sensorimotor cortex                  | No, yes, unknown, unavailable           |
| Visual cortex                        | No, yes, unknown, unavailable           |
| Language cortex                      | No, yes, unknown, unavailable           |
| Thalamus/hypothalamus                | No, yes, unknown, unavailable           |
| Internal capsule                     | No, yes, unknown, unavailable           |
| Cerebellar peduncle                  | No, yes, unknown, unavailable           |
| Brain stem                           | No, yes, unknown, unavailable           |
| Other eloquence comment              | String                                  |
| AVM location                         |                                         |
| AVM side                             | R/l/midline                             |
| AVM location                         | Superficial/subcortical/deep/post fossa |
| AVM border with adjacent brain       | Sharp, diffuse                          |
| Cortical cerebral hemisphere         | No, yes, unknown, unavailable           |
| Subcortical                          | No, yes, unknown, unavailable           |
| Callosal                             | No, yes, unknown, unavailable           |
| Ventricular                          | No, yes, unknown, unavailable           |
| Posterior fossa                      | No, yes, unknown, unavailable           |
| Dural                                | No, yes, unknown, unavailable           |
| Corpus callosum                      | No, yes, unknown, unavailable           |
| Frontal                              | No, yes, unknown, unavailable           |
| Temporal                             | No, yes, unknown, unavailable           |
| Parietal                             | No, yes, unknown, unavailable           |
| Occipital                            | No, yes, unknown, unavailable           |
| Basal ganglia                        | No, yes, unknown, unavailable           |
| Choroidal                            | No, yes, unknown, unavailable           |
| Internal capsule                     | No, yes, unknown, unavailable           |
| Cerebellar hemisphere                | No, yes, unknown, unavailable           |
| Vermian (paramedian)                 | No, yes, unknown, unavailable           |
| Deep cerebellar nuclei               | No, yes, unknown, unavailable           |
| Intraventricular                     | No, yes, unknown, unavailable           |
| Brain stem                           | No, yes, unknown, unavailable           |
| Thalamic                             | No, yes, unknown, unavailable           |
| Glomerular? nidus-type AVM?          | No, yes, unknown, unavailable           |
| Location comment                     | String                                  |
| Feeders                              |                                         |
| Pial-to-pial collateralization       | No, yes, unknown, unavailable           |
| Moyamoya-type changes                | No, yes, unknown, unavailable           |
| Stenoses on arteries                 | No, yes, unknown, unavailable           |
| Type                                 | Pial/choroidal                          |
| Feeding artery information available | Y/n                                     |

Continued on next page

## Continued

| Field                            | Data Type/Range                                            |
|----------------------------------|------------------------------------------------------------|
| Feeding arteries (No.)           |                                                            |
| ICA penetrators                  | Numeric (0–5) or unknown                                   |
| AchoA                            | Numeric (0–5) or unknown                                   |
| ACA                              | Numeric (0–5) or unknown                                   |
| MCA cortical                     | Numeric (0–5) or unknown                                   |
| ACA/MCA penetrators              | Numeric (0–5) or unknown                                   |
| VA branches or penetrators       | Numeric (0–5) or unknown                                   |
| PCA cortical                     | Numeric (0–5) or unknown                                   |
| PCA penetrators                  | Numeric (0–5) or unknown                                   |
| PchoA                            | Numeric (0–5) or unknown                                   |
| BA penetrators                   | Numeric (0–5) or unknown                                   |
| SCA                              | Numeric (0–5) or unknown                                   |
| AICA                             | Numeric (0–5) or unknown                                   |
| PICA                             | Numeric (0–5) or unknown                                   |
| ECA branches (dural)             | Numeric (0–5) or unknown                                   |
| Nidus                            |                                                            |
| No. of compartments              | Numeric (0–5) or unknown                                   |
| En passage versus terminal type  | No, yes, unknown, unavailable                              |
| Type                             | Sulcal/gyral/callosal/deep                                 |
| Intermingled brain               | No, yes, unknown, unavailable                              |
| Diffuse vs sharp                 | Diffuse, sharp, unknown, unavailable                       |
| Size (largest diameter)          | Numeric                                                    |
| Aneurysms                        |                                                            |
| No.                              | Numeric (0–5) or unknown                                   |
| High-flow                        | Y/n/unknown/unavailable                                    |
| Proximal                         | Y/n/unknown/unavailable                                    |
| Distal                           | Y/n/unknown/unavailable                                    |
| Intranidal                       | Y/n/unknown/unavailable                                    |
| Venous drainage                  |                                                            |
| No.                              | Numeric (0–5) or unknown                                   |
| Type                             | Superficial/deep/both                                      |
| Venous stenosis                  | 0–24, 25–49, 75–99, 100 = occlusion                        |
| Venous ectasia                   | No, yes, unknown, unavailable                              |
| Severity of venous ectasia       | Mild/moderate/severe                                       |
| Venous reflux                    | No, yes, unknown, unavailable                              |
| Distal thrombosis/stenosis       | 0–24, 25–49, 75–99, 100 = occlusion                        |
| Pseudophlebitic pattern          | Y/n/unknown/unavailable                                    |
| Other signs of venous congestion | Y/n/unknown/unavailable                                    |
| Pathomechanism                   |                                                            |
| Imaging shows complications      | Y/n/unknown/unavailable                                    |
| Thrombosis of vein               | Proven/likely/unlikely/excluded                            |
| Mass effect                      | Proven/likely/unlikely/excluded                            |
| Congestion                       | Proven/likely/unlikely/excluded                            |
| Steal                            | Proven/likely/unlikely/excluded                            |
| Intraparenchymal hemorrhage      | Proven/likely/unlikely/excluded                            |
| Subarachnoid hemorrhage          | Proven/likely/unlikely/excluded                            |
| Capillary vascular malformations |                                                            |
| Size (largest diameter)          | Numeric                                                    |
| AVM side                         | R/l/midline                                                |
| AVM lobe                         | Frontal/parietal/temporal/occ/limbic/brain stem/cerebellum |
| AVM location                     | Superficial/subcortical/deep                               |
| MRI visible                      | Y/n/unknown/unavailable                                    |
| Feeders                          |                                                            |
| Type                             | Pial/choroidal                                             |

Continued on next page

## Continued

| Field                                  | Data Type/Range                 |
|----------------------------------------|---------------------------------|
| Feeding arteries information available |                                 |
| Feeding arteries (No.)                 |                                 |
| ICA penetrators                        | Numeric (0/1) or unknown        |
| AchoA                                  | Numeric (0/1) or unknown        |
| ACA                                    | Numeric (0/1) or unknown        |
| MCA cortical                           | Numeric (0/1) or unknown        |
| ACA/MCA penetrators                    | Numeric (0/1) or unknown        |
| VA branches or penetrators             | Numeric (0/1) or unknown        |
| PCA cortical                           | Numeric (0/1) or unknown        |
| PCA penetrators                        | Numeric (0/1) or unknown        |
| PchoA                                  | Numeric (0/1) or unknown        |
| BA penetrators                         | Numeric (0/1) or unknown        |
| SCA                                    | Numeric (0/1) or unknown        |
| AICA                                   | Numeric (0/1) or unknown        |
| PICA                                   | Numeric (0/1) or unknown        |
| ECA branches (dural)                   | Numeric (0/1) or unknown        |
| Pathomechanism                         |                                 |
| Imaging shows complications            | Y/n/unknown/unavailable         |
| Thrombosis of vein                     | Proven/likely/unlikely/excluded |
| Mass effect                            | Proven/likely/unlikely/excluded |
| Congestion                             | Proven/likely/unlikely/excluded |
| Steal                                  | Proven/likely/unlikely/excluded |
| Intraparenchymal hemorrhage            | Proven/likely/unlikely/excluded |
| Subarachnoid hemorrhage                | Proven/likely/unlikely/excluded |

**Note:**—ID indicates identification; AchoA, anterior choroidal artery; ACA, anterior cerebral artery; PCA, posterior cerebral artery; PchoA, posterior choroidal artery; BA, basilar artery; SCA, superior cerebellar artery; ECA, external carotid artery; VA, vertebral artery; Y/n, yes/no; R/L, right/left; angio, angiography; occ, occipital; post, posterior.
